# Supplementary material
Source: PubMed Central journal article supplement (PMC3385967)
Supplement: supp_11-8114_IOVS-11-8114-s01.pdf [file supp_11-8114_IOVS-11-8114-s01.pdf]

A

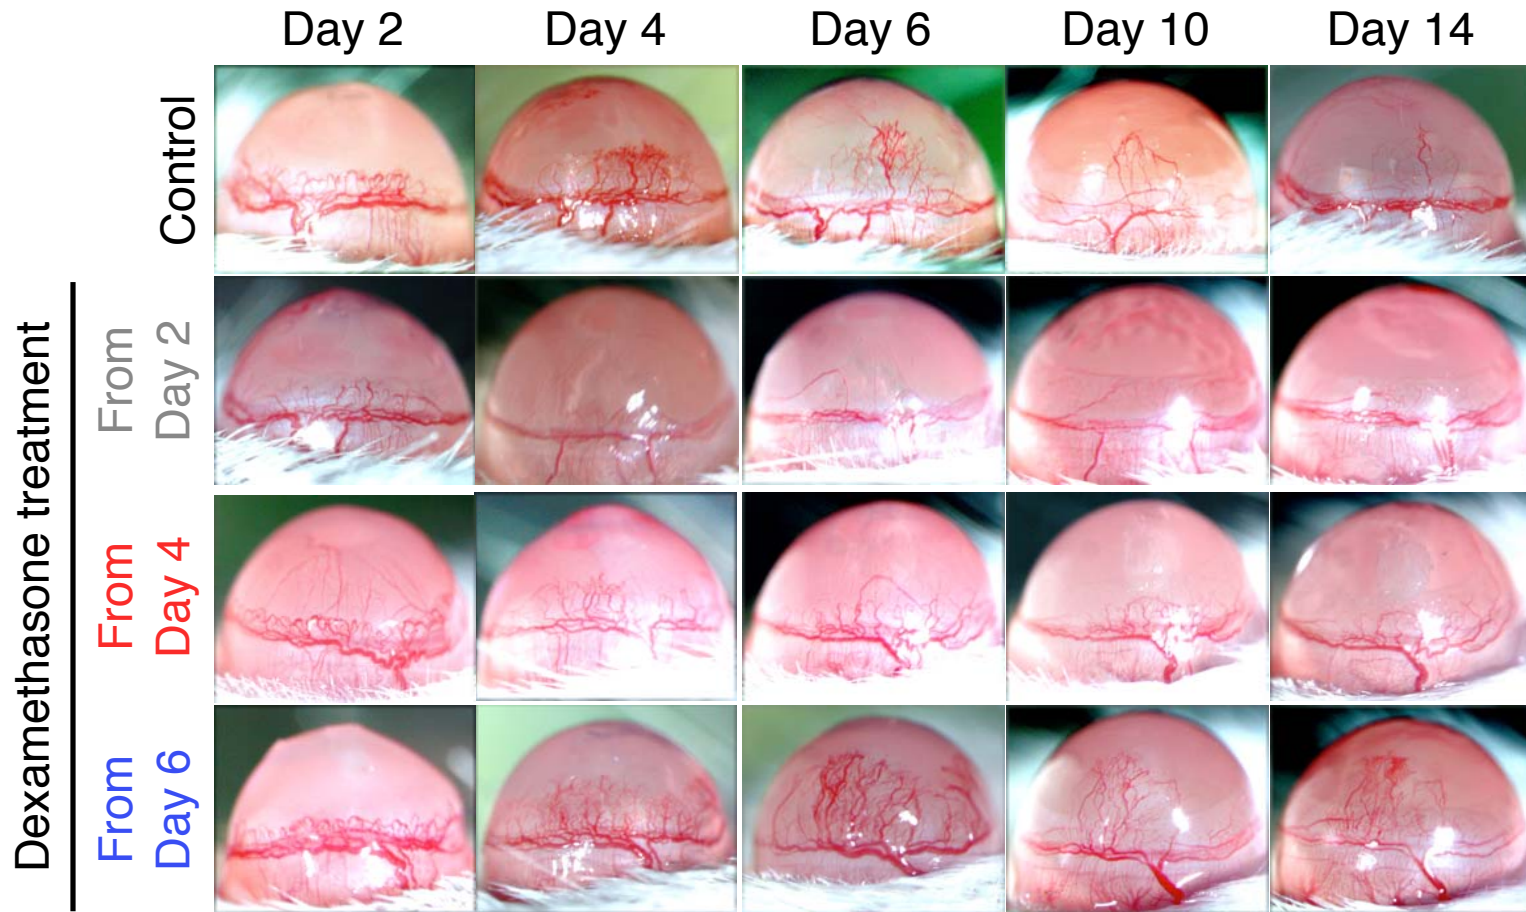

Supplemental Figure 1

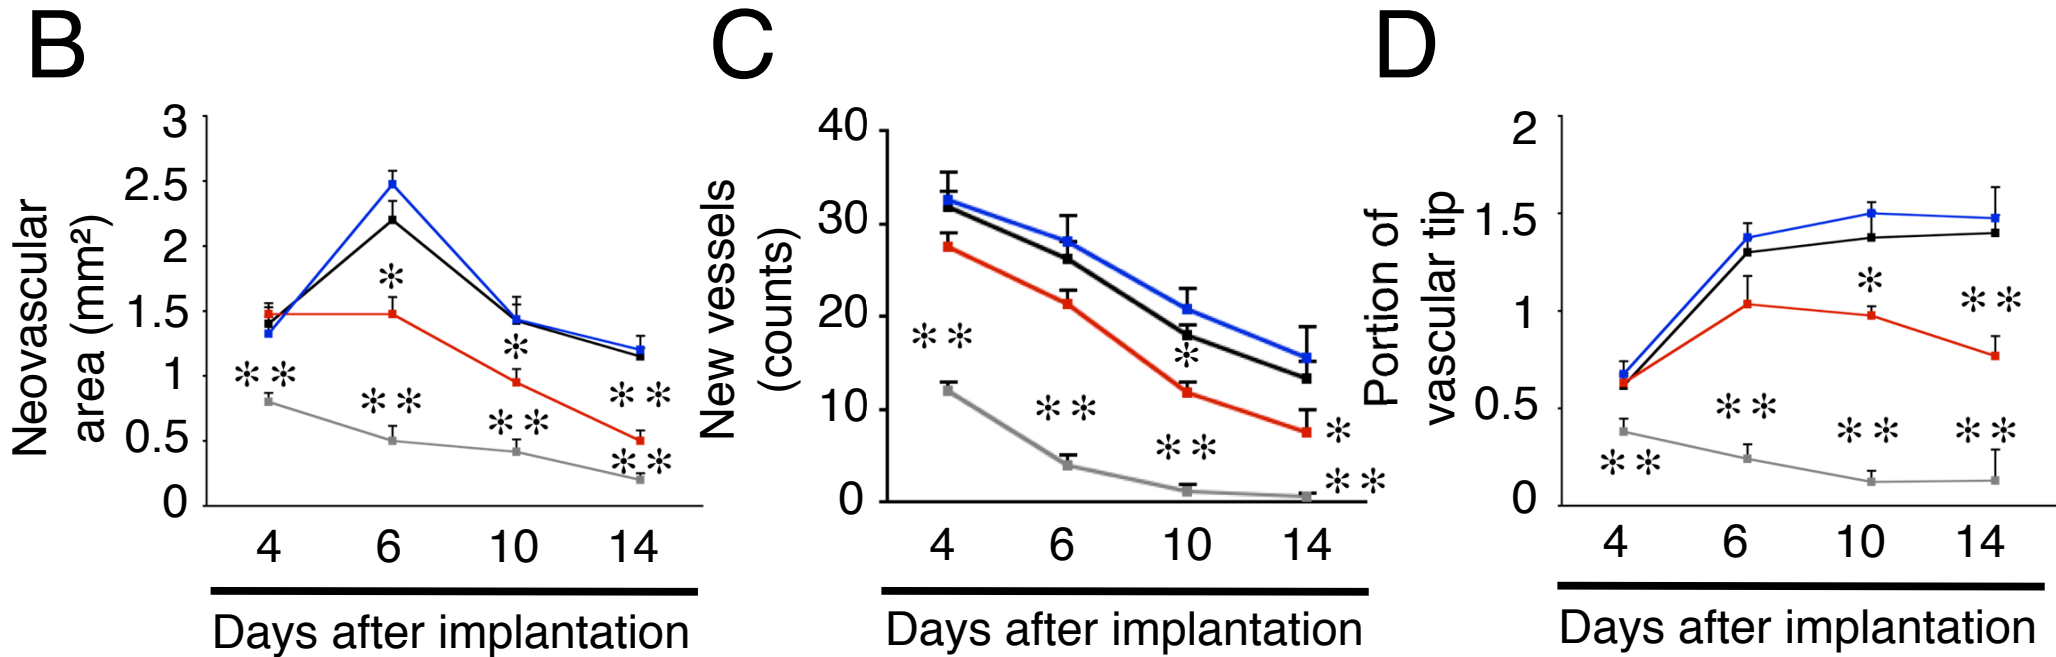

**Time-dependent efficacy of steroids in inflammatory angiogenesis.** Topical dexamethasone treatment started from day 2, 4, or 6 after IL-1 $\beta$  implantation in corneas of BALB/c mice. **A)** Photomicrographs of IL-1 $\beta$ -implanted corneas of BALB/c mice on days 2, 4, 6, 10, and 14 after the implantation with or without dexamethasone treatment. **B-D)** Quantitation of the number of angiogenic area (B), vessel number (C) or portion of vascular tips (D) in IL-1 $\beta$ -induced angiogenesis on days 4, 6, 10, and 14 after implantation without (black) or with dexamethasone treatment from day 2 (gray), day 4 (red) or day 6 (blue) ( $n=4-6$ ). \* $P < 0.05$ ; \*\* $P < 0.01$ .
