# Supplementary material
Source: PubMed Central journal article supplement (PMC3385967)

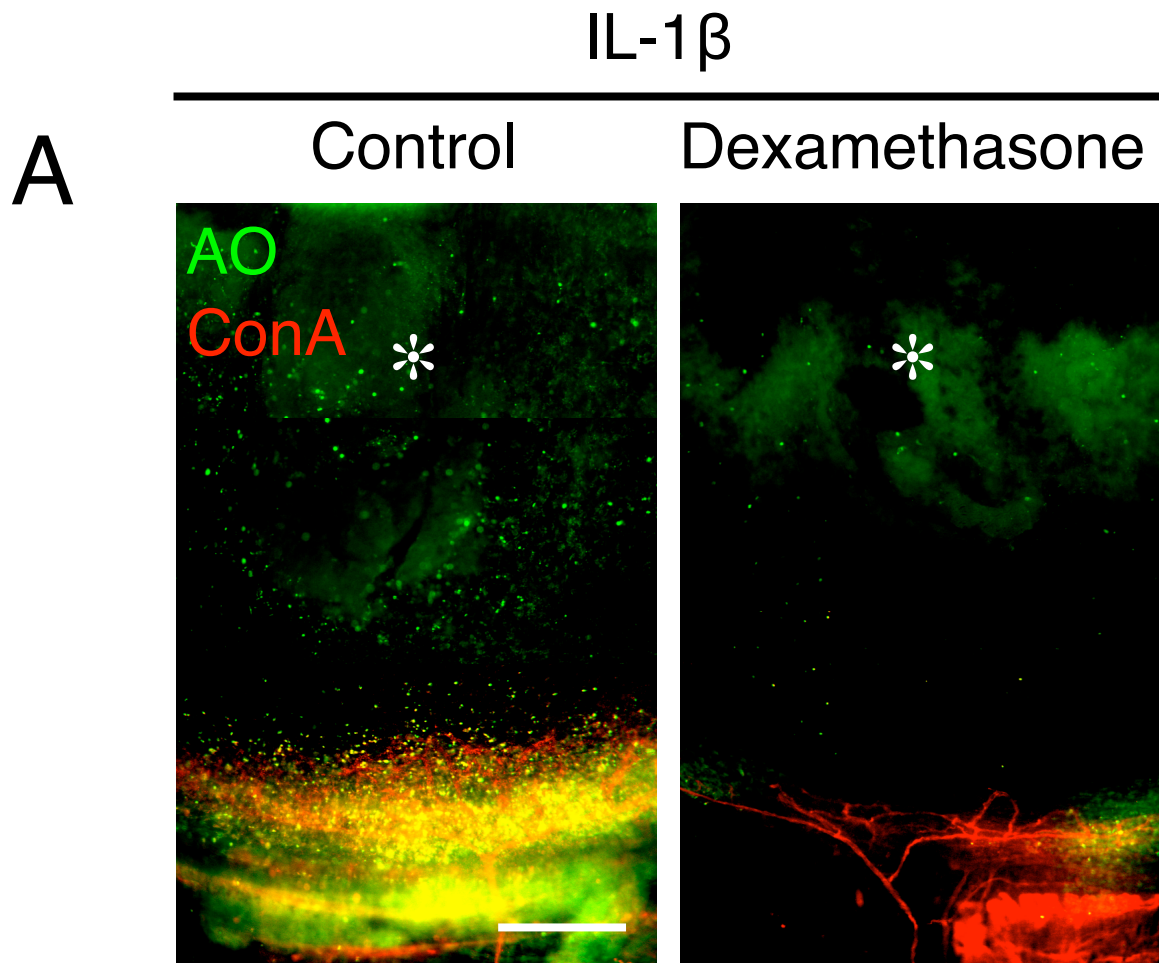

Supplement: supp_11-8114_IOVS-11-8114-s02.pdf [file supp_11-8114_IOVS-11-8114-s02.pdf]
